# Supplementary material
Source: publisher site journal article supplement (https://www.dovepress.com/article/467056)
Supplement: Supplementary file 1 [file get_supplementary_file.php]

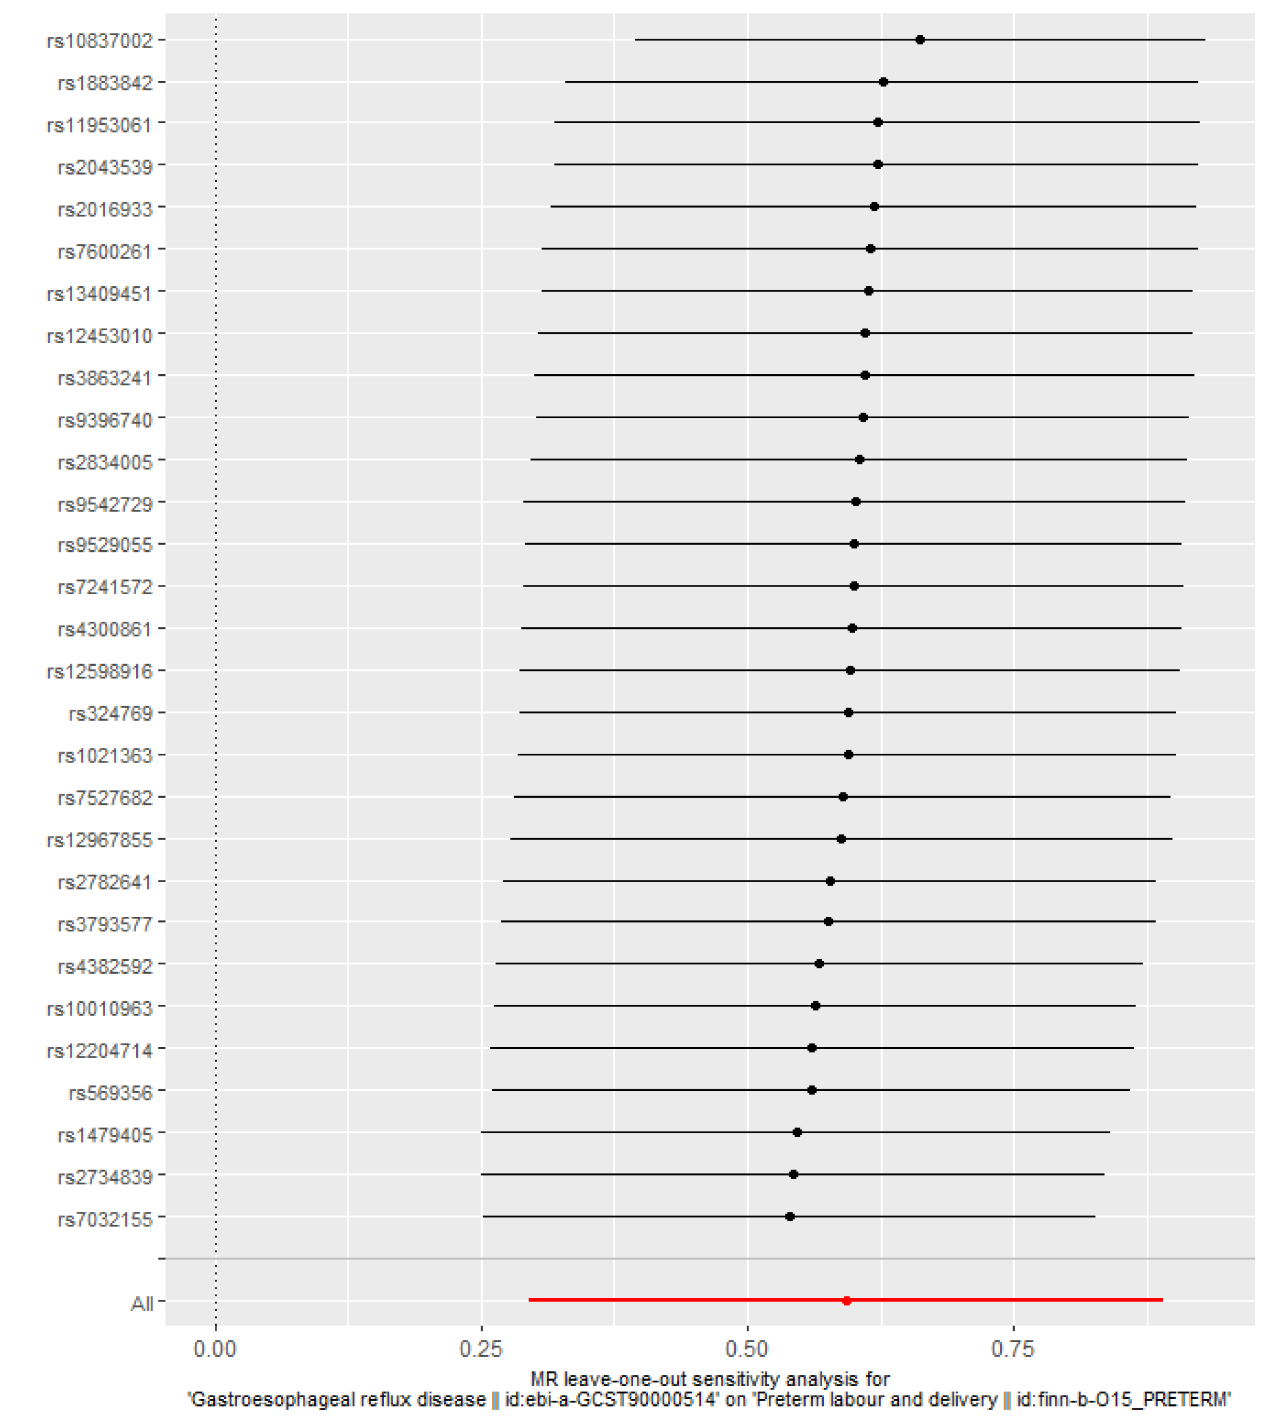


Supplementary Figure 1 Leave-one-out sensitivity analysis of the causal effect of GERD on PTB.


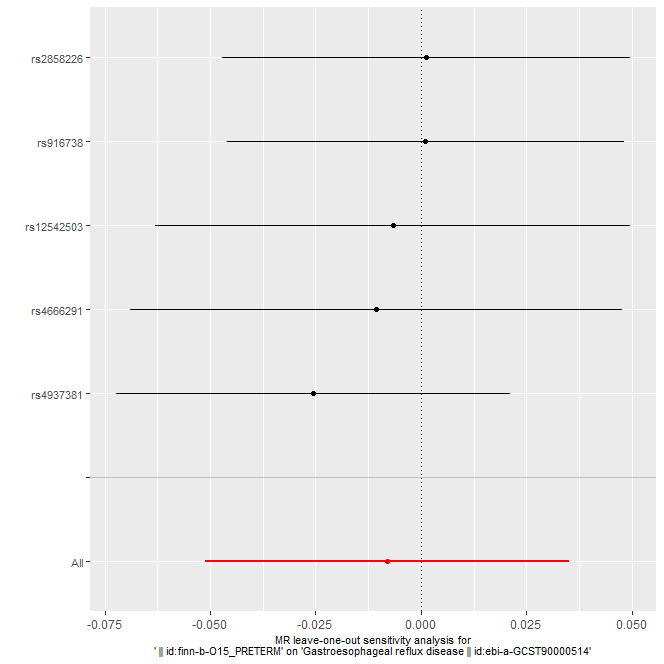


Supplementary Figure 2 Leave-one-out sensitivity analysis of the causal effect of PTB on GERD.
